# Supplementary material for: Parabens, Triclosan and Bisphenol A in Surface Waters and Sediments of Baiyang Lake, China: Occurrence, Distribution, and Potential Risk Assessment
Source: MDPI journal article supplement (doi:10.3390/toxics12010031), 2023-12-31
Supplement: s1 [file s1]

## Supplementary Material

### **Parabens, Triclosan and Bisphenol A in Surface Waters and Sediments of Baiyang Lake, China: Occurrence, Distribution, and Potential Risk Assessment**

Liguo Fu <sup>a</sup>, Yaxue Sun <sup>a</sup>, Hongbo Li <sup>c</sup>, Yan Chen <sup>a</sup>, Hui Du <sup>a</sup>, Shu-xuan Liang <sup>a, b, \*</sup>

<sup>a</sup> Key Laboratory of Analytical Science and Technology of Hebei Province, College of Chemistry and Materials Science, Hebei University, Baoding 071002, PR China.

<sup>b</sup> Institute of Life Science and Green Development, Hebei University, Baoding 071002, PR China

<sup>c</sup> Baiyangdian Basin Eco-environmental Support Center, Shijiazhuang 050056, China.

---

\* Corresponding author

Shu-xuan Liang

E-mail address: liangsx168@126.com; Telephone number: +86-312-507-9359

## Figure captions and Table legends

**Table S1** Physicochemical characteristics of the target compounds.

**Table S2** Temperature, dissolved oxygen (DO) and pH of surface water samples and fraction of organic carbon (Foc) in sediments.

**Table S3** Correlation coefficient ( $R^2$ ), recoveries (%), mean) from spiked matrices, relative standard deviation (RSD), limits of detection (LODs) and limits of quantitation (LOQs) for target compounds in surface water and sediment.

**Table S4** Acceptable daily intake (ADI) and adsorption coefficient ( $K_{oc}$ ) of the target compounds; daily water intake ( $IR_w$ ) and body weight (BW) of different populations.

**Table S5** Chronic or acute toxicity values and PNEC) values of target compounds.

**Table S6** Comparison of parabens, triclosan and bisphenol A concentrations in surface water from the Baiyang Lake with those from other regions in the world.

**Table S7** Comparison of parabens, triclosan and bisphenol A concentrations in sediment from the Baiyang Lake with those from other regions in the world.

**Table S8** Relationship of all the targeted compounds in surface water.

**Table S9** Relationship of all the targeted compounds in sediment.

**Table S1.** Physicochemical characteristics of the target compounds.

| Compound                | Structure                                                                           | MW <sup>a</sup><br>(g/mol) | BP <sup>b</sup><br>(°C) | S <sub>w</sub> <sup>c</sup><br>(mg/L) | pKa <sup>d</sup> | log K <sub>ow</sub> |
|-------------------------|-------------------------------------------------------------------------------------|----------------------------|-------------------------|---------------------------------------|------------------|---------------------|
| Methyl paraben<br>(MeP) | 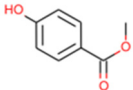   | 152.15                     | 270                     | 5981                                  | 8.17             | 1.96                |
| Ethyl paraben<br>(EtP)  |    | 166.17                     | 297.5                   | 960                                   | 8.22             | 2.49                |
| Propyl paraben<br>(PrP) |    | 180.20                     | 294.3                   | 390                                   | 8.35             | 2.98                |
| Butyl paraben<br>(BuP)  |    | 194.23                     | 133                     | 207                                   | 8.37             | 3.24                |
| Triclosan<br>(TCS)      |   | 228.29                     | 302.6                   | 1200                                  | 7.9              | 10.29               |
| Bisphenol A<br>(BPA)    |  | 289.54                     | 400.8                   | 120                                   | 10.29            | 4.80                |

<sup>a</sup> MW: molecular weight; <sup>b</sup> BP: boiling point; <sup>c</sup> S<sub>w</sub>: aqueous solubility at neutral pH; <sup>d</sup> pKa: acid-base reactivity.

**Table S2.** Temperature, dissolved oxygen (DO) and pH of surface water samples and fraction of organic carbon (Foc) in sediments.

| Station | Longitude | Latitude | T (°C) | DO (mg/L) | pH   | Foc (kg/g) |
|---------|-----------|----------|--------|-----------|------|------------|
| S1      | 115.9396  | 38.9063  | 12.6   | 4.76      | 6.8  | 0.066      |
| S2      | 115.9980  | 38.9638  | 13.8   | 9.65      | 7.36 | 0.060      |
| S3      | 116.0363  | 38.9011  | 14     | 5.49      | 7.55 | 0.085      |
| S4      | 116.0370  | 38.8617  | 10     | 8.04      | 7.64 | 0.084      |
| S5      | 116.0308  | 38.8226  | 11     | 9.65      | 7.53 | 0.079      |
| S6      | 116.0949  | 38.8889  | 12     | 6.36      | 7.04 | 0.089      |
| S7      | 115.9573  | 38.8415  | 10     | 9.72      | 7.65 | 0.106      |
| S8      | 116.0111  | 38.9293  | 13.7   | 8.61      | 7.82 | 0.071      |
| S9      | 115.9995  | 38.9171  | 13.6   | 7.58      | 7.92 | 0.070      |
| S10     | 115.9991  | 38.8786  | 14.5   | 8.07      | 7.53 | 0.079      |
| S11     | 116.0573  | 38.8772  | 10     | 9.73      | 7.74 | 0.091      |
| S12     | 116.0082  | 38.8361  | 11     | 8.28      | 6.38 | 0.092      |
| S13     | 116.0036  | 38.8575  | 9      | 7.69      | 7.71 | 0.090      |
| S14     | 115.9001  | 38.8349  | 9      | 10.32     | 7.2  | 0.115      |
| S15     | 115.8876  | 38.8176  | 10     | 9.47      | 7.3  | 0.106      |
| S16     | 116.0284  | 38.8208  | 11     | 8.1       | 7.47 | 0.076      |
| S17     | 116.0106  | 38.9651  | 13.8   | 9.93      | 7.52 | 0.060      |
| S18     | 115.9971  | 38.8438  | 11     | 9.35      | 7.23 | 0.076      |
| S19     | 115.9282  | 38.9051  | 13     | 6.55      | 7.76 | 0.066      |
| S20     | 115.9698  | 38.9092  | 12.5   | 5.09      | 7.42 | 0.072      |
| S21     | 115.9776  | 38.9679  | 13.7   | 10.49     | 7.64 | 0.060      |
| S22     | 116.0210  | 38.7971  | 12.3   | 7.68      | 7.76 | 0.052      |

**Table S3.** Correlation coefficient ( $R^2$ ), recoveries (%), mean) from spiked matrices, relative standard deviation (RSD), limits of detection (LODs) and limits of quantitation (LOQs) for target compounds in surface water and sediment.

| Compound | $R^2$  | Surface water           |            |               |               | Sediment                |            |                |                |
|----------|--------|-------------------------|------------|---------------|---------------|-------------------------|------------|----------------|----------------|
|          |        | Recoveries<br>(%, mean) | RSD<br>(%) | LOD<br>(ng/L) | LOQ<br>(ng/L) | Recoveries<br>(%, mean) | RSD<br>(%) | LODs<br>(ng/g) | LOQs<br>(ng/g) |
| MeP      | 0.9970 | 82.8                    | 3.0        | 0.21          | 0.7           | 83.8                    | 3.2        | 0.32           | 1.07           |
| EtP      | 0.9990 | 85.2                    | 3.5        | 0.12          | 0.4           | 83.4                    | 5.8        | 0.26           | 0.86           |
| PrP      | 0.9975 | 83.6                    | 3.3        | 0.15          | 0.5           | 80.4                    | 4.0        | 0.12           | 0.4            |
| BuP      | 0.9969 | 81.2                    | 2.8        | 0.03          | 0.1           | 69.7                    | 3.1        | 0.07           | 0.23           |
| TCS      | 0.9975 | 105                     | 8.0        | 0.36          | 1.2           | 99                      | 8.8        | 0.57           | 1.9            |
| BAP      | 0.9952 | 114.2                   | 7.7        | 0.39          | 1.3           | 101.4                   | 5.9        | 0.63           | 2.09           |

**Table S4.** Acceptable daily intake (ADI) and adsorption coefficient (Koc) of the target compounds; daily water intake (IR<sub>w</sub>) and body weight (BW) of different populations.

| Compound | ADI<br>(mg/kg BW/d) | Koc<br>(L/kg) |          | IR <sub>w</sub><br>(L/d) | BW<br>(kg) |
|----------|---------------------|---------------|----------|--------------------------|------------|
| MeP      | 10                  | 129           | Children | 1.000                    | 26.800     |
| EtP      | 10                  | 246.9         | Woman    | 1.350                    | 55.100     |
| PrP      | 0.1                 | 510.3         | Man      | 1.825                    | 64.800     |
| BuP      | –                   | 1002          |          |                          |            |
| TCS      | 1.2                 | 1245          |          | .                        |            |
| BPA      | 0.05                | 8417          |          |                          |            |

**Table S5.** Toxicity values and PNEC values of target compounds.

| Analytes | Trophic level | Toxicity         | Toxicity Value (mg/L) | AF <sup>a</sup> | PNEC (ng/L) |
|----------|---------------|------------------|-----------------------|-----------------|-------------|
| MeP      | Algae         | LC <sub>50</sub> | 50                    | 1000            | 50000       |
|          | Invertebrate  | EC <sub>50</sub> | 11.2                  | 1000            | 11200       |
|          | Fish          | EC <sub>50</sub> | 59.5                  | 1000            | 59500       |
| EtP      | Algae         | LC <sub>50</sub> | 18                    | 1000            | 18000       |
|          | Invertebrate  | EC <sub>50</sub> | 20                    | 1000            | 20000       |
|          | Fish          | EC <sub>50</sub> | 15                    | 1000            | 15000       |
| PrP      | Algae         | LC <sub>50</sub> | 36                    | 1000            | 36000       |
|          | Invertebrate  | LC <sub>50</sub> | 15.4                  | 1000            | 15400       |
|          | Fish          | EC <sub>50</sub> | 6.4                   | 1000            | 6400        |
| BuP      | Algae         | LC <sub>50</sub> | 0.058                 | 1000            | 58          |
|          | Invertebrate  | LOEC             | 0.2                   | 100             | 2000        |
|          | Fish          | EC <sub>50</sub> | 4.2                   | 1000            | 4200        |
| TCS      | Algae         | NOEC             | 0.0002                | 100             | 2           |
|          | Invertebrate  | LC <sub>50</sub> | 0.47                  | 1000            | 470         |
|          | Fish          | LC <sub>50</sub> | 0.6                   | 1000            | 600         |
| BPA      | Algae         | NOEC             | 1.17                  | 100             | 11700       |
|          | Invertebrate  | NOEC             | 3.146                 | 100             | 31460       |
|          | Fish          | LC <sub>50</sub> | 3                     | 1000            | 3000        |

<sup>a</sup> AF: assessment factor.

**Table S6.** Comparison of parabens, triclosan and bisphenol A concentrations in surface water from the Baiyang Lake with those from other regions in the world.

| Location                      | Year      | N <sup>a</sup> | Detected concentration (ng/L) |           |             |           |                 |                | Region       | Reference                           |
|-------------------------------|-----------|----------------|-------------------------------|-----------|-------------|-----------|-----------------|----------------|--------------|-------------------------------------|
|                               |           |                | MeP                           | EtP       | PrP         | BuP       | TCS             | BPA            |              |                                     |
| Sweden's three largest lakes  | 2019–2020 | 51             | n.d. <sup>b</sup> –22         | –         | n.d. –19    | –         | –               | –              | Sweden       | Malnes et al. (2022)                |
| Lake Mälaren                  | 2017      | 7              | <0.28–0.85                    | –         | <0.056–0.19 | –         | –               | –              | Sweden       | Golovko et al. (2020)               |
| Lake Wierzbiczańskie          | 2015–2016 | 1              | 7–38.4                        | 1.7–14.7  | 3.7–10.4    | 1.3–5.5   | –               | 6.7–19.5       | Poland       | Czarczynska-Goslinska et al. (2017) |
| Al-Hassa shallow lakes        | 2017–2018 | 10             | n.d. –27.4                    | n.d. –6.2 | n.d. –12.5  | n.d.–65.2 | n.d.–33.5       | n.d.–484.9     | Saudi Arabia | Picó et al. (2020)                  |
| Mediterranean coastal wetland | 2016–2017 | 32             | 0–107                         | 0–82      | 0–135       | 0–71      | 0–72            | 12–205         | Spain        | Sadutto et al. (2021)               |
| Lake Michigan                 | 2009–2010 | 8              | –                             | –         | –           | –         | 24 <sup>c</sup> | –              | USA          | Blair et al. (2013)                 |
| Donghu Lake                   | 2020–2021 | 8              | –                             | –         | –           | –         | n.d. –466       | –              | China        | Wang et al. (2022)                  |
| Liangzi Lake                  | 2020–2021 | 14             | –                             | –         | –           | –         | n.d. –239       | –              | China        | Wang et al. (2022)                  |
| Donghu Lake                   | 2013–2014 | 15             | –                             | –         | –           | –         | n.d. –6.5       | n.d. –37.1     | China        | Wu et al. (2015)                    |
| Dongting Lake                 | 2014      | 4              | –                             | –         | –           | –         | 10 <sup>d</sup> | 5 <sup>d</sup> | China        | Xu et al. (2022)                    |
| Venice lagoon                 | 2001–2002 | 4              | –                             | –         | –           | –         | –               | <1.0–145       | Italy        | Pojana et al. (2007)                |



|                 |      |    |           |            |            |           |           |            |       |                     |
|-----------------|------|----|-----------|------------|------------|-----------|-----------|------------|-------|---------------------|
| Yundang Lagoon  | 2008 | 4  | –         | –          | –          | –         | –         | 14.2–31.4  | China | Zhang et al. (2011) |
| Dianchi Lake    | 2011 | 10 | –         | –          | –          | –         | –         | 15.5–530   | China | Wang et al. (2012)  |
| Dalong Lake     | 2015 | 5  | –         | –          | –          | –         | –         | 15–53      | China | Yu et al. (2016)    |
| Taihu Lake      | 2016 | 26 | –         | –          | –          | –         | –         | 19–68      | China | Liu et al. (2017)   |
| Bengaluru lakes | 2018 | 6  | –         | –          | –          | –         | –         | n.d.–26.4  | India | Gopal et al. (2021) |
| Baiyang Lake    | 2021 | 22 | 0.11–4.72 | n.d. –2.06 | n.d. –1.38 | n.d.–0.43 | 7.6–62.54 | 3.2–114.74 | China | This study          |

<sup>a</sup> N: number of sampling points; <sup>b</sup> n.d.: not detected; <sup>c</sup> max concentration; <sup>d</sup> mean concentration.

**Table S7.** Comparison of parabens, triclosan and bisphenol A concentrations in sediment from the Baiyang Lake with those from other regions in the world.

| Location                      | Year      | N <sup>a</sup> | Detected content (ng/g) |            |            |                         |                  |                 | Region | Reference               |
|-------------------------------|-----------|----------------|-------------------------|------------|------------|-------------------------|------------------|-----------------|--------|-------------------------|
|                               |           |                | MeP                     | EtP        | PrP        | BuP                     | TCS              | BPA             |        |                         |
| Mediterranean coastal wetland | 2016–2017 | 19             | 0–19                    | 0–18       | 0–12       | 0–7                     | 7–18             | 0–21            | Spain  | Sadutto et al. (2021)   |
| Lake Shihwa                   | 2008      | 34             | 2.43–16.2               | 0.315–2.67 | 0.097–64.5 | n.d. <sup>b</sup> –29.1 | –                | –               | Korea  | Liao et al. (2013)      |
| Lake Mälaren                  | 2017      | 3              | <0.92–2.4               | –          | –          | –                       | –                | –               | Sweden | Golovko et al. (2020)   |
| Liangzi Lake                  | 2020–2021 | 14             | –                       | –          | –          | –                       | n.d. –25         | –               | China  | Wang et al. (2022)      |
| Lake Michigan                 | 2009–2010 | 8              | –                       | –          | –          | –                       | 150 <sup>c</sup> | –               | USA    | Blair et al. (2013)     |
| Dongting Lake                 | 2014      | 5              | –                       | –          | –          | –                       | 4 <sup>d</sup>   | 20 <sup>d</sup> | China  | Xu et al. (2022)        |
| Donghu Lake                   | 2013–2014 | 15             | –                       | –          | –          | –                       | n.d. –71         | n.d. –37.1      | China  | Wu et al. (2015)        |
| Yundang Lagoon                | 2008      | 4              | –                       | –          | –          | –                       | –                | 21.2–50.9       | China  | Zhang et al. (2011)     |
| Venice lagoon                 | 2000–2002 | 4              | –                       | –          | –          | –                       | –                | <2.0–118        | Italy  | Pojana et al. (2007)    |
| Anzali Wetland                | 2010      | 5              | –                       | –          | –          | –                       | –                | 10–6970         | Iran   | Mortazavi et al. (2012) |
| Dianchi Lake                  | 2011      | 10             | –                       | –          | –          | –                       | –                | 2.5–167         | China  | Wang et al. (2012)      |
| Baiyang Lake                  | 2021      | 22             | 2.42–13.56              | n.d. –2.16 | n.d. –4.01 | n.d. –0.17              | 5.07–83.79       | 4.63–64.59      | China  | This study              |

<sup>a</sup> N: number of sampling points; <sup>b</sup> n.d.: not detected; <sup>c</sup> max concentration; <sup>d</sup> mean concentration.

**Table S8.** Relationship of all the targeted compounds in surface water.

|     | MeP    | EtP    | PrP    | BuP    | TCS    | BPA  |
|-----|--------|--------|--------|--------|--------|------|
| MeP | 1.00   |        |        |        |        |      |
| EtP | 0.70** | 1.00   |        |        |        |      |
| PrP | 0.68** | 0.63** | 1.00   |        |        |      |
| BuP | 0.46*  | 0.68** | 0.65** | 1.00   |        |      |
| TCS | 0.65** | 0.81** | 0.68** | 0.71** | 1.00   |      |
| BPA | 0.31   | 0.59** | 0.17   | 0.50*  | 0.68** | 1.00 |

\*\*The relationship is significant while  $p < 0.01$

\*The relationship is significant while  $p < 0.05$

**Table S9.** Relationship of all the targeted compounds in sediment.

|     | MeP    | EtP    | PrP    | BuP    | TCS    | BPA  |
|-----|--------|--------|--------|--------|--------|------|
| MeP | 1.00   |        |        |        |        |      |
| EtP | 0.71** | 1.00   |        |        |        |      |
| PrP | 0.80** | 0.75** | 1.00   |        |        |      |
| BuP | 0.65** | 0.55** | 0.74** | 1.00   |        |      |
| TCS | 0.92** | 0.63** | 0.76** | 0.64** | 1.00   |      |
| BPA | 0.66** | 0.41   | 0.58** | 0.53*  | 0.69** | 1.00 |

\*\*The relationship is significant while  $p < 0.01$

\*The relationship is significant while  $p < 0.05$
